# Supplementary material for: Mitochondrial Phylogenomics of Modern and Ancient Equids
Source: PubMed Central journal article supplement (PMC3577844; doi:10.1371/journal.pone.0055950), 2013-02-20
Supplement: pone.0055950.s002.pdf [file pone.0055950.s002.pdf]

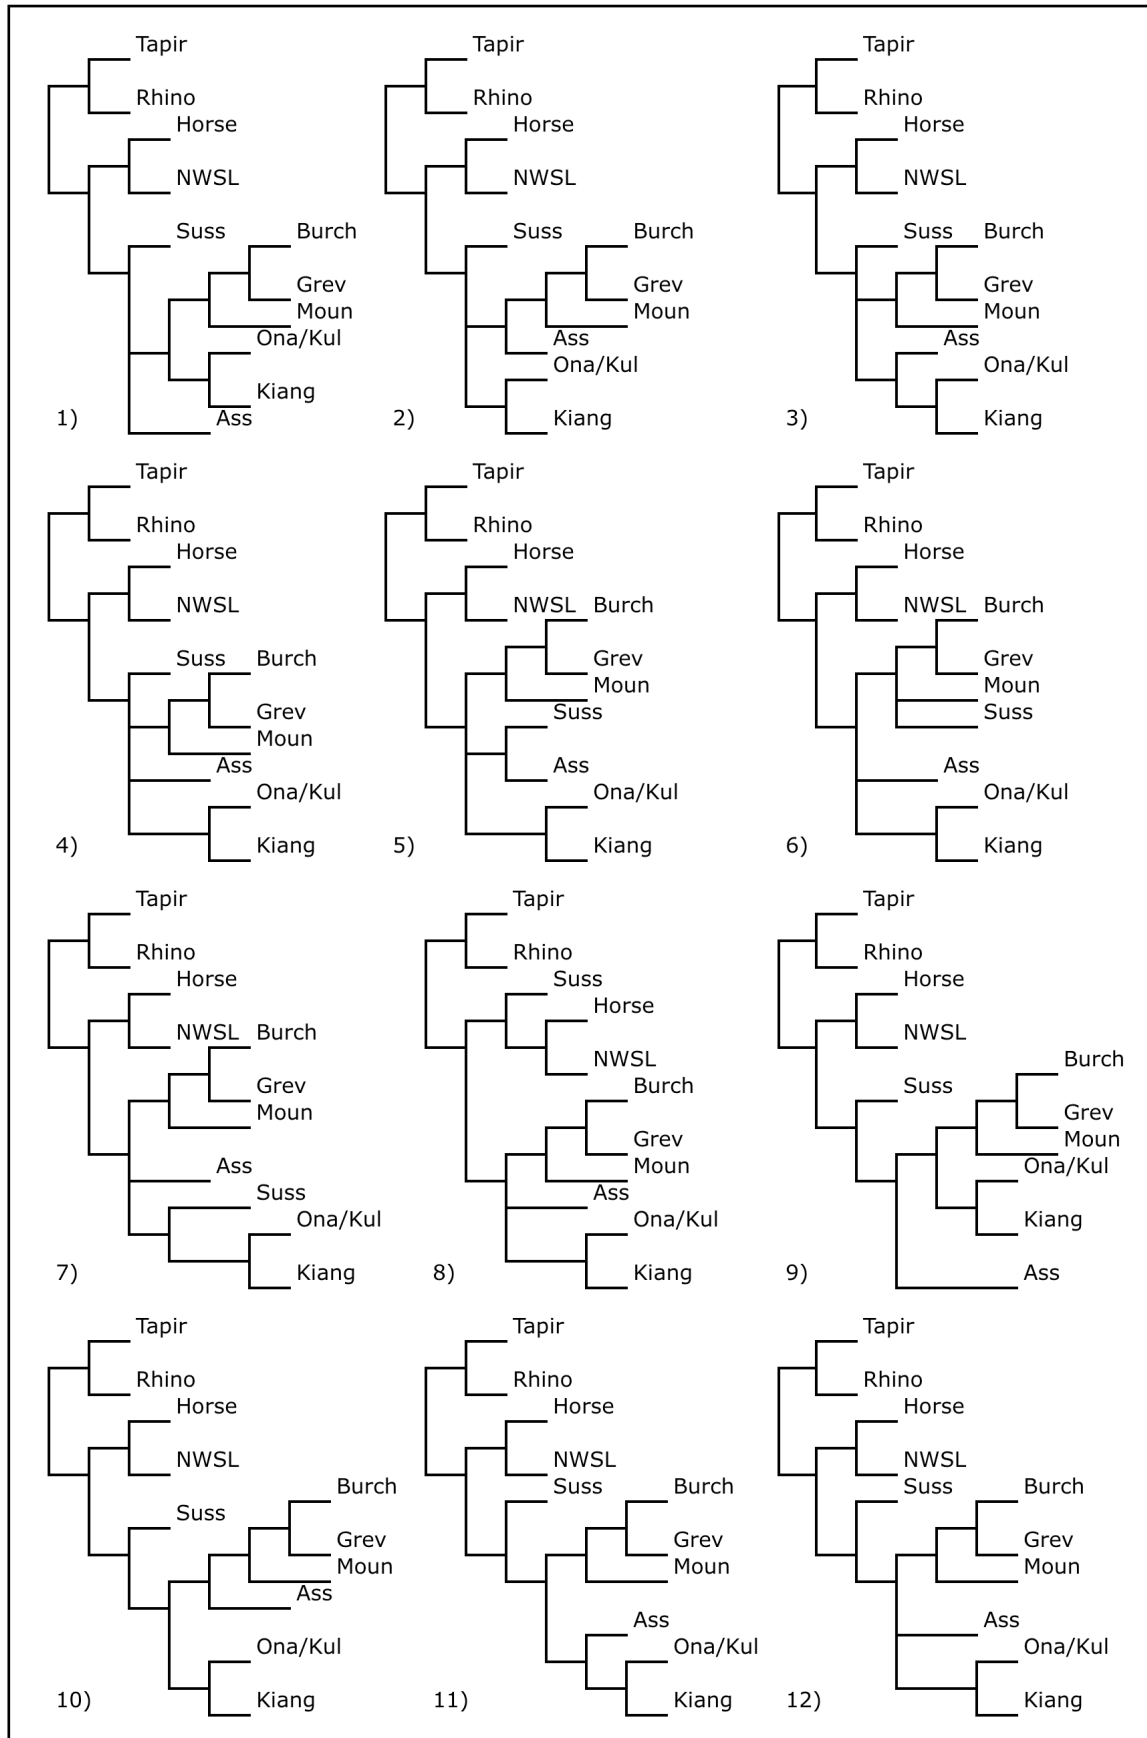

**Figure S2: The 12 topologies tested in the topological test.** Topology number 1 to 12 is equivalent to item number in Table S2. Suss = Sussemione (*E. ovodovi*); Burch = Plains zebra (*E. quagga*); Grev = Grevy's zebra (*E. grevyi*); Moun = Mountain zebra (*E. zebra*); Ass = African wild ass and domestic donkey (*E. africanus* and *E. asinus*); Ona/Kul = *E. hemionus* (Onager and Kulan).
