# Supplementary material for: Mitochondrial Phylogenomics of Modern and Ancient Equids
Source: PubMed Central journal article supplement (PMC3577844; doi:10.1371/journal.pone.0055950), 2013-02-20
Supplement: pone.0055950.s004.pdf [file pone.0055950.s004.pdf]

**Table S1: Published mitogenomes used in analyses from Genbank.** Includes both equids and non-equid outgroups.

| <b>Sample name</b> | <b>Species name</b>             | <b>Common name/breed</b> | <b>Location</b>                      | <b>Genbank acc. no.</b> | <b>Reference</b>     |
|--------------------|---------------------------------|--------------------------|--------------------------------------|-------------------------|----------------------|
| Bel001             | <i>Equus caballus</i>           | Belgian draft            | Europe centre                        | JN398420                | [19]                 |
| NoF001             | <i>E. caballus</i>              | Norwegian fjord          | Europe North                         | JN398398                | [19]                 |
| CsP001             | <i>E. caballus</i>              | Caspian pony             | Middle East                          | JN398378                | [19]                 |
| Sil001             | <i>E. caballus</i>              | Silensian                | Europe centre                        | JN398431                | [19]                 |
| Mrm009             | <i>E. caballus</i>              | Maremmano                | Europe south                         | JN398456                | [19]                 |
| AkT001             | <i>E. caballus</i>              | Akhal-Teke               | Asia centre                          | JN398450                | [19]                 |
| Mrm001             | <i>E. caballus</i>              | Maremmano                | Europe south                         | JN398437                | [19]                 |
| Prz002             | <i>E. przewalskii</i>           | Przewalski               | Asia centre                          | JN398403                | [19]                 |
| HQ439484           | <i>E. przewalskii</i>           | Przewalski               | East Asia                            | HQ439484                | [17]                 |
| AP012269           | <i>E. przewalskii</i>           | Przewalski               | San Diego Zoo                        | AP012269                | [14]                 |
| AP012271           | <i>E. africanus somalicus</i>   | Somalian wild ass        | San Diego Zoo<br>Glasgow Vet.<br>Sc. | AP012271                | [14]                 |
| X97337             | <i>E. asinus</i>                | Domestic donkey          | Sc.                                  | X97337                  | [25]                 |
| HM118851           | <i>E. kiang</i>                 | Kiang                    | Tibet                                | HM118851                | [24]                 |
| FJ905816           | <i>Dicerorhinus sumatrensis</i> | Sumatran rhinoceros      | Cincinnati Zoo                       | FJ905816                | [90]                 |
| FJ905813           | <i>Coelodonta antiquitatis</i>  | Woolly rhinoceros        | Yakutia, Russia                      | FJ905813                | [90]                 |
| X97336             | <i>Rhinoceros unicornis</i>     | Indian rhinoceros        | Berlin Zoo<br>NHM, Uni.              | X97336                  | [25]                 |
| FJ905815           | <i>Rhinoceros sondaicus</i>     | Javan rhinoceros         | Oxford<br>Uni.                       | FJ905815                | [90]                 |
| Y07726             | <i>Ceratotherium simum</i>      | White rhinoceros         | Copenhagen<br>Copenhagen<br>Zoo      | Y07726                  | [91]                 |
| FJ905814           | <i>Diceros bicornis</i>         | Black rhinoceros         | Zoo                                  | FJ905814                | [90]                 |
| AJ428947           | <i>Tapirus terrestris</i>       | Lowland tapir            | Kolmården<br>Zoo, Sweden             | AJ428947                | Janke et al. Unpubl. |
