# Supplementary material for: Mitochondrial Phylogenomics of Modern and Ancient Equids
Source: PubMed Central journal article supplement (PMC3577844; doi:10.1371/journal.pone.0055950), 2013-02-20
Supplement: pone.0055950.s005.pdf [file pone.0055950.s005.pdf]

**Table S2: Topological test results.** Table displaying results of the 12 different topologies tested. The topologies are visually illustrated in Figure S2. Item = Topology number (Figure S2).

| <b>rank</b> | <b>item</b> | <b>obs</b> | <b>au</b> | <b>np</b> | <b>bp</b> | <b>pp</b> | <b>kh</b> | <b>sh</b> | <b>wkh</b> | <b>wsh</b> |
|-------------|-------------|------------|-----------|-----------|-----------|-----------|-----------|-----------|------------|------------|
| 1           | 11          | -2.000     | 0.772     | 0.443     | 0.444     | 0.699     | 0.629     | 0.977     | 0.629      | 0.958      |
| 2           | 2           | 2.000      | 0.579     | 0.232     | 0.232     | 0.095     | 0.371     | 0.775     | 0.371      | 0.837      |
| 3           | 3           | 2.200      | 0.231     | 0.076     | 0.074     | 0.080     | 0.187     | 0.733     | 0.187      | 0.538      |
| 4           | 12          | 3.400      | 0.264     | 0.046     | 0.047     | 0.022     | 0.215     | 0.713     | 0.215      | 0.715      |
| 5           | 10          | 3.400      | 0.264     | 0.046     | 0.047     | 0.022     | 0.215     | 0.713     | 0.215      | 0.715      |
| 6           | 6           | 3.500      | 0.323     | 0.058     | 0.026     | 0.020     | 0.265     | 0.635     | 0.265      | 0.810      |
| 7           | 4           | 3.500      | 0.321     | 0.057     | 0.023     | 0.020     | 0.265     | 0.634     | 0.265      | 0.804      |
| 8           | 1           | 3.900      | 0.307     | 0.113     | 0.112     | 0.015     | 0.244     | 0.607     | 0.244      | 0.618      |
| 9           | 5           | 4.000      | 0.169     | 0.020     | 0.018     | 0.013     | 0.247     | 0.594     | 0.195      | 0.634      |
| 10          | 9           | 4.200      | 0.165     | 0.021     | 0.019     | 0.010     | 0.152     | 0.620     | 0.152      | 0.556      |
| 11          | 7           | 5.300      | 0.070     | 0.003     | 0.003     | 0.003     | 0.150     | 0.519     | 0.141      | 0.545      |
| 12          | 8           | 24.400     | 0.001     | 4E-04     | 4E-04     | 2E-11     | 0.006     | 0.016     | 0.006      | 0.016      |
