# Supplementary material for: Mitochondrial Phylogenomics of Modern and Ancient Equids
Source: PubMed Central journal article supplement (PMC3577844; doi:10.1371/journal.pone.0055950), 2013-02-20
Supplement: pone.0055950.s006.pdf [file pone.0055950.s006.pdf]

**Table S3a: jModelTest model selection on full data set.** The best model selected by jModelTest per gene or codon is displayed according to analysis.

| Gene/Codon  | Best model* | Best model according to |         |
|-------------|-------------|-------------------------|---------|
|             |             | PhyML                   | MrBayes |
| <i>ND1</i>  | TrN+I+G     | TrN+I+G                 | GTR+I+G |
| <i>ND2</i>  | TIM1+I+G    | TrN+I+G                 | GTR+I+G |
| <i>COX1</i> | GTR+I+G     | GTR+I+G                 | GTR+I+G |
| <i>COX2</i> | TVM+I+G     | GTR+I+G                 | GTR+I+G |
| <i>ATP8</i> | TrN+G       | TrN+G                   | HKY+G   |
| <i>ATP6</i> | TrN+I+G     | TrN+I+G                 | GTR+I+G |
| <i>COX3</i> | TVM+I+G     | GTR+I+G                 | GTR+I+G |
| <i>ND3</i>  | TPM1uf+I+G  | HKY+I+G                 | HKY+I+G |
| <i>ND4L</i> | HKY+G       | HKY+G                   | HKY+G   |
| <i>ND4</i>  | GTR+I+G     | GTR+I+G                 | GTR+I+G |
| <i>ND5</i>  | GTR+I+G     | GTR+I+G                 | GTR+I+G |
| <i>ND6</i>  | TPM1uf+G    | HKY+G                   | HKY+G   |
| <i>CYTB</i> | TrN+I+G     | TrN+I+G                 | HKY+I+G |
| <i>CR</i>   | HKY+G       | HKY+G                   | HKY+G   |
| 12sRNA      | GTR+I+G     | GTR+I+G                 | GTR+I+G |
| 16sRNA      | GTR+G       | GTR+G                   | GTR+G   |
| Codon1      | GTR+I+G     | GTR+I+G                 | GTR+I+G |
| Codon2      | GTR+I+G     | GTR+I+G                 | GTR+I+G |
| Codon3      | TIM1+I+G    | GTR+I+G                 | GTR+I+G |
| RNAs        | GTR+I+G     | GTR+I+G                 | GTR+I+G |
| unpart      | TVM+I+G     | GTR+I+G                 | GTR+I+G |

\* for RaxML and MrBayes GTR+I+G was chosen for both the 4 and the 5 partitions datasets.

**Table S3b: jModelTest model selection on data set excluding non-equid outgroups.** The best model selected by jModelTest per gene or codon is displayed according to analysis.

| Gene/Codon  | Best model* | Best model according to |         |
|-------------|-------------|-------------------------|---------|
|             |             | PhyML                   | MrBayes |
| <i>ND1</i>  | HKY+G       | HKY+G                   | HKY+G   |
| <i>ND2</i>  | TPM1uf+I    | HKY+I                   | HKY+I   |
| <i>COX1</i> | TPM1uf+I    | GTR+I                   | GTR+I   |
| <i>COX2</i> | TVM+G       | GTR+G                   | GTR+G   |
| <i>ATP8</i> | TrN+G       | TrN+G                   | HKY+G   |
| <i>ATP6</i> | TrN+I       | TrN+I                   | GTR+I   |
| <i>COX3</i> | TPM1uf+G    | HKY+G                   | HKY+G   |
| <i>ND3</i>  | TPM1uf+I    | HKY+I                   | HKY+I   |
| <i>ND4L</i> | HKY+G       | HKY+G                   | HKY+G   |
| <i>ND4</i>  | TIM1+I      | GTR+I                   | GTR+I   |
| <i>ND5</i>  | GTR+I+G     | GTR+I+G                 | GTR+I+G |
| <i>ND6</i>  | TPM1uf+G    | TrN+G                   | GTR+G   |
| <i>CYTB</i> | TrN+I       | TrN+I                   | GTR+I   |
| <i>CR</i>   | TrN+G       | TrN+G                   | HKY+G   |
| 12sRNA      | TIM1+G      | GTR+G                   | GTR+G   |
| 16sRNA      | TIM+I+G     | TrN+I+G                 | GTR+I+G |
| Codon1      | GTR+I+G     | GTR+I+G                 | GTR+I+G |
| Codon2      | TIM1+I+G    | GTR+I+G                 | GTR+I+G |
| Codon3      | TIM1+I+G    | GTR+I+G                 | GTR+I+G |
| RNAs        | TIM+I+G     | GTR+I+G                 | GTR+I+G |
| unpart      | TVM+G       | GTR+I+G                 | GTR+I+G |

\* for RaxML and MrBayes GTR+I+G was chosen for both the 4 and the 5 partitions datasets excluding outgroups.
