# Supplementary material for: Mitochondrial Phylogenomics of Modern and Ancient Equids
Source: PubMed Central journal article supplement (PMC3577844; doi:10.1371/journal.pone.0055950), 2013-02-20
Supplement: pone.0055950.s007.pdf [file pone.0055950.s007.pdf]

**Table S4: Primer pairs used to amplify some of the modern**

**mitogenomes.** Ta = annealing temperature, Ext. = extension time, Size = size of the amplicon generated by the primer pair, Location = a rough estimate of the part of the mitogenome the primers amplify based on the horse reference mitogenome (JN398398). \* SF and LF are universal mammalian mitogenome amplifying primers (designed in-house by Sandra Abel Nielsen), Pr1 and Pr2 are from study Xu et al. [19], and Pr3 was designed in-house by Ludovic Orlando.

| Primer pair  | Primer sequence                 | Ta °C                                                                                                                                    | Ext.        | Size (bp) | Location bp   |
|--------------|---------------------------------|------------------------------------------------------------------------------------------------------------------------------------------|-------------|-----------|---------------|
| LF_Fwd*      | 5'-CCGCCTGTTTACCAAAAACATCACC-3' | 59                                                                                                                                       | 16min       | 15,100    | 1,980-580     |
| LF_Rev*      | 5'-CGAATTTTGARTTTCCTGRACCGCC-3' |                                                                                                                                          |             |           |               |
| SF_Fwd*      | 5'-GCTTAAACTYAAAGGACYTGGCGG-3'  | 59                                                                                                                                       | 1min<br>30s | 1,400     | 580-1,980     |
| SF_Rev*      | 5'-GGCGGACAAATGGTTTTGTAGTGG-3'  |                                                                                                                                          |             |           |               |
| Pr3_Fwd*     | 5'-CTCCCAAAAGCCCATGTAGA-3'      | 50                                                                                                                                       | 6min<br>30s | 6,500     | 10,800-750    |
| Pr3_Rev*     | 5'-GYCTACACCTTGACCTAACG-3'      |                                                                                                                                          |             |           |               |
| LF_Fwd       | see above                       | 50                                                                                                                                       | 11min       | 10,900    | 1,900-12,800  |
| Pr3.2_Rev    | 5'-TGCTCGTCATTTAGGCTGTG-3'      |                                                                                                                                          |             |           |               |
| 6.3_Fwd      | 5'-CACATCAGCTACCATAATCATCGC-3'  | 50                                                                                                                                       | 5min        | 5,000     | 6,300-11,300  |
| 11.3_Rev     | 5'-GGTTAGGCTGGCTAATAGTCATC-3'   |                                                                                                                                          |             |           |               |
| 1.6_Fwd      | 5'-GCAGCCATCAATTAAGAAAGCG-3'    | 53                                                                                                                                       | 6min<br>30s | 6,200     | 1,600-7,800   |
| 7.8_Rev      | 5'-CATGTTGATGTATCCAAGTGGC-3'    |                                                                                                                                          |             |           |               |
| 10.5_Fwd     | 5'-CCGCCACAGAACTAATCTCC-3'      | 50                                                                                                                                       | 5min        | 5,000     | 10,500-15,400 |
| 15.4_Rev     | 5'-GTTGATGGTGGAGCTAGAGC-3'      |                                                                                                                                          |             |           |               |
| 14.3_Fwd     | 5'-CCTAGGAATCTGCCTAATCC-3'      | 48                                                                                                                                       | 3min        | 3,000     | 14,300-750    |
| Pr3_Rev      | see above                       |                                                                                                                                          |             |           |               |
| Pr1_Fwd*     | 5'-TAACATGAATCGGCGGACA-3'       | 57                                                                                                                                       | 90s         | 2,000     | 15,190-700    |
| Pr1_Rev*     | 5'-TTGCTGAAGATGGCGGTAT-3'       |                                                                                                                                          |             |           |               |
| Pr2_Fwd*     | 5'-ATTTCCATAGACAGGCATCC-3'      | 57                                                                                                                                       | 90s         | 1,500     | 16,600-1,440  |
| Pr2_Rev*     | 5'-TCACCTCTACCTACGAATCTTCT-3'   |                                                                                                                                          |             |           |               |
| MAC_16.2_Fwd | 5'-ATTACTCCGCATCAGCAACC-3'      | 53                                                                                                                                       | 30s         | 200       | 16,200-16,400 |
| MAC_16.4_Rev | 5'-GGGGGTTTGATTARGAAARTTACA-3'  |                                                                                                                                          |             |           |               |
| MAC_1.4_Fwd  | 5'-TGTCGCAAAATAGTGAGAAGATTT-3'  | 53                                                                                                                                       | 30s         | 200       | 1,400-1,600   |
| MAC_1.6_Rev  | 5'-TGGCTGCTTTTAAGCCAACCT-3'     |                                                                                                                                          |             |           |               |
| MAC_16.5_Fwd | 5'-ACCCCRAAAACAAGACYAAA-3'      | 53                                                                                                                                       | 30s         | 100       | 16,500-16,600 |
| MAC_16.6_Rev | 5'-TGYAGGTTTGGAAAATCAGA-3'      |                                                                                                                                          |             |           |               |
| MAC_1.8_Fwd  | 5'-CAACCCAAAACTAACCACCT-3'      | 53                                                                                                                                       | 30s         | 200       | 1,800-2,000   |
| MAC_2.0_Rev  | 5'-TTTGCACGGTTAGGATACCG-3'      |                                                                                                                                          |             |           |               |
| 0.7rev       | 5'-GATTAAGTCGGATATATGGCGG-3'    | (These were designed for sequencing at MacroGen together with the SF.Fwd and SF.Rev primers, and were never amplified in our laboratory) |             |           |               |
| 1.0fwd       | 5'-GTATACCGGAAGGTGTAAGTGG-3'    |                                                                                                                                          |             |           |               |
| 1.4rev       | 5'-CTTGTTGAGTAGATACAGCG-3'      |                                                                                                                                          |             |           |               |
| 1.8fwd       | 5'-GTTAACCCAACACAGGCATG-3'      |                                                                                                                                          |             |           |               |
