# Supplementary material for: Mitochondrial Phylogenomics of Modern and Ancient Equids
Source: PubMed Central journal article supplement (PMC3577844; doi:10.1371/journal.pone.0055950), 2013-02-20
Supplement: pone.0055950.s009.pdf [file pone.0055950.s009.pdf]

**Table S6: Nucleotide frequency composition of all samples.** Nucleotide frequencies in percent of total number of nucleotides (excluding tandem repeats).

| <b>Sample</b>                   | <b>T (U)</b> | <b>C</b> | <b>A</b> | <b>G</b> | <b>Total</b> |
|---------------------------------|--------------|----------|----------|----------|--------------|
| JW328_E.sp.NWSLH                | 25.3         | 29.4     | 30.3     | 14.9     | 7035         |
| ACAD2304_E.ovodovi              | 25.4         | 29       | 32.5     | 13.2     | 16166        |
| MS272_E.sp.NWSLH                | 26.3         | 28       | 32.6     | 13.1     | 16042        |
| X97337_E.asinus                 | 25.9         | 28.5     | 32.4     | 13.2     | 16412        |
| AP012271_E.a.somalicus          | 26           | 27.8     | 32.8     | 13.4     | 14083        |
| AP012269_E.przewalskii_Bonnette | 25.8         | 28.5     | 32.5     | 13.2     | 16155        |
| HM118851_E.kiang                | 25.8         | 28.6     | 32.5     | 13.1     | 16423        |
| Kulan_E.hemionus_kulan          | 25.9         | 28.4     | 32.6     | 13.1     | 16380        |
| O91_E.hemionus_onager           | 25.8         | 28.6     | 32.5     | 13.1     | 16378        |
| K41_E.kiang                     | 25.8         | 28.6     | 32.5     | 13.1     | 16379        |
| K32_E.kiang                     | 25.8         | 28.6     | 32.5     | 13       | 16380        |
| 1023_E.zebra_hartmannae         | 25.9         | 28.6     | 32.3     | 13.3     | 16402        |
| 1041_E.zebra_hartmannae         | 25.8         | 28.6     | 32.3     | 13.3     | 16404        |
| H11_E.zebra_hartmannae          | 26           | 28.5     | 32.3     | 13.3     | 16389        |
| H21_E.zebra_hartmannae          | 25.8         | 28.6     | 32.3     | 13.3     | 16408        |
| 6390_E.grevyi                   | 25.9         | 28.6     | 32.5     | 13.1     | 16402        |
| CGG10096_E.grevyi               | 25.6         | 29       | 32.1     | 13.3     | 14711        |
| G51_E.grevyi                    | 25.9         | 28.6     | 32.5     | 13.1     | 16400        |
| G42_E.grevyi                    | 25.9         | 28.5     | 32.5     | 13.1     | 16389        |
| 6381_E.quagga_chapmani          | 26           | 28.5     | 32.5     | 13.1     | 16406        |
| QUAGGa_E.quagga_quagga          | 26           | 28.4     | 32.4     | 13.2     | 16364        |
| CGG10086_E.quagga_chapmani      | 26           | 28.5     | 32.4     | 13.2     | 16243        |
| HQ439484_E.przewalskii          | 25.9         | 28.4     | 32.5     | 13.2     | 16415        |
| CsP001_E.caballus_A             | 25.9         | 28.4     | 32.5     | 13.2     | 16412        |
| NoF001_E.caballus_D             | 25.9         | 28.4     | 32.5     | 13.2     | 16411        |
| Prz002_E.caballus_F             | 25.9         | 28.4     | 32.5     | 13.2     | 16411        |
| Bel001_E.caballus_K             | 25.9         | 28.5     | 32.5     | 13.2     | 16411        |
| Sil001_E.caballus_L             | 25.9         | 28.4     | 32.4     | 13.3     | 16410        |
| Mrm001_E.caballus_M             | 25.9         | 28.4     | 32.5     | 13.2     | 16411        |
| Akt001_E.caballus_Q             | 25.8         | 28.5     | 32.4     | 13.3     | 16411        |
| Mrm009_E.caballus_R             | 25.9         | 28.4     | 32.5     | 13.2     | 16411        |
| FJ905815_R.sondaicus            | 26.3         | 27.3     | 33.6     | 12.7     | 16364        |
| FJ905813_C.antiquitatis         | 26.4         | 27.3     | 33.5     | 12.8     | 16381        |
| FJ905814_D.bicornis             | 26           | 27.9     | 33.4     | 12.7     | 16358        |
| AJ428947_T.terrestris           | 28           | 25.2     | 34.2     | 12.6     | 16377        |
| X97336_R.unicornis              | 26.3         | 27.4     | 33.6     | 12.6     | 16430        |
| Y07726_C.simum                  | 25.9         | 27.9     | 33.3     | 13       | 16398        |
| FJ905816_D.sumatrensis          | 25.4         | 28.2     | 33.1     | 13.3     | 16419        |
