# Supplementary material for: Mitochondrial Phylogenomics of Modern and Ancient Equids
Source: PubMed Central journal article supplement (PMC3577844; doi:10.1371/journal.pone.0055950), 2013-02-20
Supplement: pone.0055950.s010.pdf [file pone.0055950.s010.pdf]

**Table S7: Results from branch selection tests.** dN/dS for each branch given per gene, calculated from PAML under Model 2 (with Model 0 values in the second to last bottom row). Branch numbers are as in Figure S1. Values superior to 1 are highlighted in bold. P-values from LRT are given in the bottom row, with p-values  $\leq 0.02$  highlighted in bold.

| Branch       | ATP6          | ATP8          | COX1   | COX2        | COX3          | CYTB   | ND1    | ND2          | ND3    | ND4           | ND4L   | ND5          | ND6           |
|--------------|---------------|---------------|--------|-------------|---------------|--------|--------|--------------|--------|---------------|--------|--------------|---------------|
| 1            | 0.0050        | 0.0001        | 0.8566 | 0.0021      | 0.7984        | 0.3160 | 0.0067 | 0.8306       | 0.0102 | 0.0096        | 0.0001 | 0.0001       | <b>2.4777</b> |
| 2            | 0.0343        | 0.0001        | 0.0113 | 0.0001      | 0.0001        | 0.0001 | 0.0001 | 0.0001       | 0.0001 | <b>635.67</b> | 0.0001 | 0.0147       | 0.0001        |
| 3            | <b>999.00</b> | 0.2548        | 0.0001 | 0.0001      | <b>4.8396</b> | 0.0001 | 0.0001 | 0.0180       | 0.0001 | 0.0001        | 0.0001 | 0.9820       | 0.0001        |
| 4            | 0.0591        | <b>1.1179</b> | 0.0001 | 0.0001      | 0.0111        | 0.0181 | 0.0287 | 0.0327       | 0.0281 | 0.0725        | 0.0378 | 0.0809       | 0.0919        |
| 5            | 0.0139        | 0.0806        | 0.0040 | 0.0001      | 0.0001        | 0.0146 | 0.0001 | 0.0294       | 0.0445 | 0.0715        | 0.0617 | 0.0272       | 0.0289        |
| 6            | 0.0604        | 0.1083        | 0.0001 | 0.0001      | 0.0256        | 0.0001 | 0.0170 | 0.0333       | 0.0443 | 0.0365        | 0.0001 | 0.0001       | 0.0001        |
| 7            | 0.0001        | 0.0001        | 0.0001 | 0.0001      | 0.0001        | 0.0001 | 0.0461 | 0.2324       | 0.0001 | 0.0001        | 0.5323 | 0.0001       | 0.0001        |
| 8            | 0.0414        | 0.8696        | 0.0051 | 0.0169      | 0.0001        | 0.0119 | 0.0244 | 0.0667       | 0.0001 | 0.0604        | 0.1282 | 0.0436       | 0.1474        |
| 9            | 0.0318        | 0.4379        | 0.0001 | 0.0001      | 0.0001        | 0.0001 | 0.0001 | 0.0227       | 0.0001 | 0.0503        | 0.0001 | 0.0430       | 0.0898        |
| 10           | 0.0001        | 0.8466        | 0.0001 | 0.0001      | 0.0001        | 0.0001 | 0.0001 | 0.0001       | 0.0001 | 0.0611        | 0.1734 | 0.0001       | 0.0001        |
| 11           | 0.0552        | 0.0001        | 0.0001 | 0.0001      | 0.0373        | 0.0001 | 0.0001 | 0.1344       | 0.0265 | 0.0001        | 0.0001 | 0.2001       | 0.1346        |
| 12           | 0.0001        | <b>999.00</b> | 0.0001 | 0.0001      | 0.0344        | 0.0616 | 0.0001 | 0.0452       | 0.0001 | 0.1319        | 0.1109 | 0.0184       | 0.0650        |
| 13           | 0.0001        | <b>999.00</b> | 0.0001 | 0.2355      | 0.1389        | 0.0360 | 0.0234 | 0.1636       | 0.0001 | 0.1972        | 0.0001 | 0.0344       | 0.1044        |
| 14           | 0.0585        | 0.1469        | 0.0001 | 0.0001      | 0.0001        | 0.0209 | 0.0119 | 0.0466       | 0.0001 | 0.0001        | 0.0001 | 0.0390       | 0.1197        |
| 15           | 0.0469        | <b>999.00</b> | 0.0001 | 0.0001      | 0.0001        | 0.0116 | 0.0001 | 0.0905       | 0.0001 | 0.0408        | 0.0001 | 0.0001       | 0.0001        |
| Model 0      | 0.0356        | 0.2802        | 0.0048 | 0.0098      | 0.0068        | 0.0103 | 0.0109 | 0.0386       | 0.0274 | 0.0353        | 0.0287 | 0.0529       | 0.0804        |
| LRT p-values | 0.15          | >0.25         | >0.25  | <b>0.02</b> | >0.25         | >0.25  | 0.15   | <b>0.005</b> | >0.25  | <b>0.02</b>   | 0.25   | <b>0.005</b> | >0.25         |
