# Supplementary material for: Mitochondrial Phylogenomics of Modern and Ancient Equids
Source: PubMed Central journal article supplement (PMC3577844; doi:10.1371/journal.pone.0055950), 2013-02-20
Supplement: pone.0055950.s011.pdf [file pone.0055950.s011.pdf]

**Table S8: Pair-wise Distance results.**

Uncorrected pair-wise distances observed between Sussemione and other equid species.

---

|                              |       |
|------------------------------|-------|
| X97337_E.a.asinus            | 0.046 |
| AP012271_E.a.somalicus       | 0.043 |
| HM118851_E.kiang             | 0.039 |
| kulan_E.hemionus_kulan       | 0.042 |
| 091_E.hemionus_onager        | 0.039 |
| K41_E.kiang                  | 0.039 |
| K32_E.kiang                  | 0.040 |
| 1023_E.zebra                 | 0.046 |
| 1041_E.zebra                 | 0.046 |
| H11_E.zebra_hartmanni        | 0.047 |
| H21_E.zebra_hartmanni        | 0.046 |
| 6390_E.grevyi                | 0.042 |
| CGG10096_E.grevyi            | 0.043 |
| G51_E.grevyi                 | 0.042 |
| G42_E.grevyi                 | 0.042 |
| 6381_E.quagga_burchellii     | 0.042 |
| QH1_E.quagga_quagga          | 0.043 |
| CGG10086_E.quagga_burchellii | 0.043 |
| HQ439484_E.przewalskii       | 0.053 |
| CsP001_E.caballus_A          | 0.054 |
| NoF001_E.caballus_D          | 0.053 |
| Prz002_E.przewalskii_F       | 0.053 |
| Bel001_E.caballus_K          | 0.054 |
| Sil001_E.caballus_L          | 0.053 |
| Mrm001_E.caballus_M          | 0.056 |
| Akt001_E.caballus_Q          | 0.054 |
| Mrm009_E.caballus_R          | 0.055 |
| JW328_E.sp.NWSL              | 0.063 |
| M272_E.sp.NWSL               | 0.063 |
| AP012269_E.przewalskii       | 0.054 |

---
