# Supplementary material for: Mitochondrial Phylogenomics of Modern and Ancient Equids
Source: PubMed Central journal article supplement (PMC3577844; doi:10.1371/journal.pone.0055950), 2013-02-20
Supplement: pone.0055950.s012.pdf [file pone.0055950.s012.pdf]

**Table S9a: Mean node ages estimated from BEAST.** Results are with a 25% burn-in for eight different data sets including outgroups. 4p = 4 partitions; 5p = 5 partitions; BD = Births and Deaths; Y = Yule model; 1d = 1 date (Perissodactyla); 2d = 2 dates (Perissodactyla and Plains zebra); Sum. = Sumatran rhino; Woolly = woolly rhino; NWSLH = New World stilt-legged horse; Asses= *E. hemionus* and *E. kiang*; Zeb. = zebras; Donkey = *E. africanus* and *E. asinus*; Don. = Donkey. Total number of states is measured in millions of states (M). Node letter in parentheses corresponds to Figure 1.

| Node               | 4pBD1d   | 4pBD2d   | 4pY1d    | 4pY2d    | 5pBD1d   | 5pBD2d   | 5Y1d     | 5Y2d     | Average  |
|--------------------|----------|----------|----------|----------|----------|----------|----------|----------|----------|
| Root               | 5.46E+07 | 5.43E+07 | 5.47E+07 | 5.38E+07 | 5.46E+07 | 5.41E+07 | 5.47E+07 | 5.36E+07 | 5.43E+07 |
| Plains zebra       | 9.01E+05 | 7.07E+05 | 1.98E+06 | 7.26E+05 | 9.99E+05 | 7.14E+05 | 1.72E+06 | 7.34E+05 | 1.06E+06 |
| Grevy's+Plains (B) | 2.17E+06 | 1.90E+06 | 4.49E+06 | 2.78E+06 | 2.38E+06 | 1.99E+06 | 4.01E+06 | 2.68E+06 | 2.80E+06 |
| Grevy's zebra      | 5.54E+05 | 5.06E+05 | 1.21E+06 | 7.52E+05 | 6.17E+05 | 5.37E+05 | 1.02E+06 | 7.30E+05 | 7.41E+05 |
| Horses (J)         | 4.40E+05 | 4.01E+05 | 1.04E+06 | 6.31E+05 | 5.35E+05 | 4.70E+05 | 9.27E+05 | 6.55E+05 | 6.37E+05 |
| Horse+NWSLH        | 4.70E+06 | 4.30E+06 | 8.88E+06 | 6.35E+06 | 4.95E+06 | 4.34E+06 | 7.93E+06 | 5.80E+06 | 5.91E+06 |
| Mountain zebra     | 6.27E+05 | 5.68E+05 | 1.54E+06 | 9.19E+05 | 6.96E+05 | 6.13E+05 | 1.25E+06 | 8.75E+05 | 8.86E+05 |
| Rhino+Tapir        | 4.37E+07 | 4.27E+07 | 4.63E+07 | 4.23E+07 | 4.50E+07 | 4.25E+07 | 4.68E+07 | 4.25E+07 | 4.40E+07 |
| Rhinos             | 1.86E+07 | 1.74E+07 | 2.59E+07 | 2.11E+07 | 1.97E+07 | 1.73E+07 | 2.57E+07 | 2.07E+07 | 2.08E+07 |
| Sum.+Woolly        | 9.22E+06 | 8.53E+06 | 1.25E+07 | 1.04E+07 | 9.53E+06 | 8.38E+06 | 1.24E+07 | 9.99E+06 | 1.01E+07 |
| Donkey (H)         | 1.00E+06 | 9.12E+05 | 2.21E+06 | 1.48E+06 | 1.12E+00 | 9.72E+05 | 1.92E+06 | 1.40E+06 | 1.24E+06 |
| Equids             | 7.39E+06 | 6.72E+06 | 1.47E+07 | 1.01E+07 | 7.71E+06 | 6.73E+06 | 1.26E+07 | 9.08E+06 | 9.38E+06 |
| Non-caballine      | 4.63E+06 | 4.13E+06 | 9.45E+06 | 6.35E+06 | 4.81E+06 | 4.15E+06 | 8.05E+06 | 5.73E+06 | 5.91E+06 |
| Kiang (E)          | 5.02E+05 | 4.57E+05 | 1.14E+06 | 7.28E+05 | 5.54E+05 | 4.85E+05 | 9.61E+05 | 6.97E+05 | 6.91E+05 |
| Kulan/onager (G)   | 7.94E+05 | 7.20E+05 | 1.76E+06 | 1.15E+06 | 9.14E+05 | 8.00E+05 | 1.56E+06 | 1.16E+06 | 1.11E+06 |
| Asses (F)          | 8.98E+05 | 8.10E+05 | 2.05E+06 | 1.30E+06 | 9.97E+05 | 8.74E+05 | 1.71E+06 | 1.26E+06 | 1.24E+06 |
| Sussemione         | 4.87E+06 | 4.15E+06 | 9.43E+06 | 6.36E+06 | 4.79E+06 | 3.71E+06 | 8.51E+06 | 9.26E+06 | 6.39E+06 |
| Donkey+Ass (D)     | 4.21E+06 | 3.69E+06 | 8.09E+06 | 5.60E+06 | 4.31E+06 | 3.29E+06 | 7.52E+06 | 6.63E+06 | 5.42E+06 |
| Zeb+Don+Ass (C)    | 4.68E+06 | 4.04E+06 | 9.01E+06 | 6.15E+06 | 4.67E+06 | 3.59E+06 | 8.27E+06 | 6.94E+06 | 5.92E+06 |
| Zebras (A)         | 3.73E+06 | 3.32E+06 | 7.45E+06 | 5.01E+06 | 3.91E+06 | 3.36E+06 | 6.49E+06 | 4.61E+06 | 4.74E+06 |
| States             | 255M     | 256M     | 398M     | 265M     | 269M     | 268M     | 265M     | 262M     |          |

**Table S9b: Mean node ages estimated from BEAST.** Results are with a 25% burn-in for 3 different data sets without outgroups. 4p = 4 partitions; 5p = 5 partitions; BD = Births and Deaths; Y = Yule model; 1d = 1 date (Plains zebra); n = no outgroup. Total number of states is measured in millions of states (M). NWSLH = New World stilt-legged horse; Asses = *E. hemionus* and *E. kiang*; Ass = Asses; Zeb. = zebras; Don. = Donkey; Donkey = *E. africanus* and *E. asinus*. Node letter in parentheses corresponds to Figure 1.

| Node               | 4pBDn1d  | 4pYn1d   | 5pYn1d   | Average  |
|--------------------|----------|----------|----------|----------|
| Plains zebra       | 6.86E+05 | 6.86E+05 | 6.85E+05 | 6.86E+05 |
| Grevy's+Plains (B) | 1.51E+06 | 1.42E+06 | 1.47E+06 | 1.46E+06 |
| Grevy's zebra      | 3.83E+05 | 3.95E+05 | 4.02E+05 | 3.93E+05 |
| Horses (J)         | 3.32E+05 | 3.68E+05 | 3.91E+05 | 3.64E+05 |
| Horse+NWSLH        | 2.95E+06 | 2.38E+06 | 2.44E+06 | 2.59E+06 |
| Mountain zebra     | 4.64E+05 | 5.01E+05 | 4.89E+05 | 4.84E+05 |
| Donkey (H)         | 7.08E+05 | 7.05E+05 | 7.24E+05 | 7.13E+05 |
| Equids             | 4.81E+06 | 3.96E+06 | 4.04E+06 | 4.27E+06 |
| Non-caballine      | 3.14E+06 | 2.81E+06 | 2.83E+06 | 2.92E+06 |
| Kiang (E)          | 3.53E+05 | 3.81E+05 | 3.74E+05 | 3.69E+05 |
| Kulan/onager (G)   | 5.64E+05 | 5.96E+05 | 6.23E+05 | 5.94E+05 |
| Asses (F)          | 6.45E+05 | 6.89E+05 | 6.83E+05 | 6.72E+05 |
| Sussemione         | 3.13E+06 | 2.79E+06 | 2.83E+06 | 2.92E+06 |
| Donkey+Ass (D)     | 2.83E+06 | 2.48E+06 | 2.55E+06 | 2.62E+06 |
| Zeb+Don+Ass (C)    | 3.08E+06 | 2.75E+06 | 2.78E+06 | 2.87E+06 |
| Zebras (A)         | 2.53E+06 | 2.25E+06 | 4.89E+05 | 1.75E+06 |
| States             | 500M     | 500M     | 500M     |          |
